# Supplementary material for: Efficient plasmonic water splitting by heteroepitaxial junction-induced faceting of gold nanoparticles on an anatase titanium(iv) oxide nanoplate array electrode
Source: Royal Society of Chemistry journal article supplement (doi:10.1039/d4nr01013b), 2024-01-01
Supplement: d4nr01013b1.pdf [file d4nr01013b1.pdf]

Supporting Information for

**Efficient plasmonic water splitting by  
heteroepitaxial junction-induced faceting of  
gold nanoparticles on anatase titanium(IV)  
oxide nanoplate array electrode**

**Shin-ichi Naya,<sup>a</sup> Yoko Morita,<sup>b</sup> Hisashi Sugime,<sup>b,c</sup>**

**Tetsuro Soejima,<sup>b,c</sup> Musashi Fujishima,<sup>b,c</sup> Hiroaki Tada<sup>d\*</sup>**

<sup>a</sup> Environmental Research Laboratory, Kindai University, 3-4-1, Kowakae, Higashi-Osaka, Osaka 577-8502, Japan.

<sup>b</sup> Graduate School of Science and Engineering, Kindai University, 3-4-1, Kowakae, Higashi-Osaka, Osaka 577-8502, Japan.

<sup>c</sup> Department of Applied Chemistry, Faculty of Science and Engineering, Kindai University, 3-4-1, Kowakae, Higashi-Osaka, Osaka 577-8502, Japan.

<sup>d</sup> Institutes of Innovation for Future Society, Nagoya University, Furo-cho, Chikusa-ku, Nagoya 464-8603, Japan.

\* To whom correspondence should be addressed: Prof. Hiroaki Tada

E-mail: hiroaki.tada@mirai.nagoya-u.ac.jp

## Table of Contents

|                                                                                                                                                                                                                                                                                                         |    |
|---------------------------------------------------------------------------------------------------------------------------------------------------------------------------------------------------------------------------------------------------------------------------------------------------------|----|
| <b>Table S1.</b> IPCE for water splitting on Au plasmonic photocatalyst electrodes. ....                                                                                                                                                                                                                | S3 |
| <b>Table S2.</b> EIS parameters for Au/TiO <sub>2</sub> plasmonic Electrodes. ....                                                                                                                                                                                                                      | S4 |
| <b>Table S3.</b> Maximum enhancement factors ( $ E ^2/ E_0 ^2$ ) calculated for HS-Au/A-TiO <sub>2</sub> , t-Oh-Au/A-TiO <sub>2</sub> , and t-Oh-Au/R-TiO <sub>2</sub> at the LSPR peak wavelengths by the 3D-FDTD method. ....                                                                         | S5 |
| <b>Fig. S1.</b> (a) TEM image and Au particle size distribution (a) and HR-TEM image (b) of CR-Au/A-TiO <sub>2</sub> NPLA. ....                                                                                                                                                                         | S6 |
| <b>Fig. S2.</b> HR-TEM image (a) and Au particle size distribution (b) of DP-Au/R-TiO <sub>2</sub> NWA. ....                                                                                                                                                                                            | S6 |
| <b>Fig. S3.</b> Contact angle of Au NP on the A-TiO <sub>2</sub> (001) surface. ....                                                                                                                                                                                                                    | S7 |
| <b>Fig. S4.</b> Au4f XP spectra of DP-Au/A-TiO <sub>2</sub> NPLA, DP-Au/R-TiO <sub>2</sub> NWA, and CR-Au/A-TiO <sub>2</sub> NPLA. ....                                                                                                                                                                 | S7 |
| <b>Fig. S5.</b> (a) FDTD calculation models for CR-Au/A-TiO <sub>2</sub> (HS-Au/A-TiO <sub>2</sub> ) and DP-Au/A-TiO <sub>2</sub> NPLA (t-Oh-Au/A-TiO <sub>2</sub> ) (b) FDTD-simulated absorption spectra. ....                                                                                        | S8 |
| <b>Fig. S6.</b> Local electric field distribution for t-Oh-Au( $d_{Au} = 7.6$ nm)/A-TiO <sub>2</sub> calculated by the 3D-FDTD method. ....                                                                                                                                                             | S8 |
| <b>Fig. S7.</b> Photocurrent ( $J$ )-potential ( $E$ ) curves of DP-Au/A-TiO <sub>2</sub> NPLA and DP-Au/R-TiO <sub>2</sub> NWA electrodes. The current density in each system was calculated using the specific surface area of the nanostructured TiO <sub>2</sub> determined by the BET method. .... | S9 |
| <b>Fig. S8.</b> Local electric fields for t-Oh-Au/R-TiO <sub>2</sub> (a) calculated by the 3D-FDTD method, and the local electric field distributions (b). ....                                                                                                                                         | S9 |

**Table S1.** IPCE for water splitting on Au plasmonic photocatalyst electrodes

| Plasmonic metal | Size    | Semiconductor electrode | Crystal form of TiO <sub>2</sub> | IPCE (%)             | Wavelength | Ref.      |
|-----------------|---------|-------------------------|----------------------------------|----------------------|------------|-----------|
| Au              | 5.2 nm  | TiO <sub>2</sub> NWA    | anatase                          | 0.03                 | 520 nm     | 18        |
| Au              | 4.7 nm  | mp-TiO <sub>2</sub>     | anatase                          | $2.6 \times 10^{-3}$ | 560 nm     | 21        |
| Au              | 5 nm    | mp-TiO <sub>2</sub>     | rutile                           | $3 \times 10^{-4}$   | 600 nm     | 22        |
| Au              | < 20 nm | TiO <sub>2</sub> NWA    | rutile                           | ~0.03                | 520 nm     | 23        |
| Au              | 7.6     | TiO <sub>2</sub> NPLA   | anatase                          | 0.39                 | 600 nm     | This work |
| Au              | 6.2     | TiO <sub>2</sub> NWA    | rutile                           | 0.18                 | 600 nm     | This work |

### Reference

18. H. Li, S. Wang, M. Wang, Y. Gao, J. Tang, S. Zhao, H. Chi, P. Zhang, J. Qu, F. Fan and C. Li, Enhancement of Plasmon-Induced Photoelectrocatalytic Water Oxidation over Au/TiO<sub>2</sub> with Lithium Intercalation, *Angew. Chem. Int. Ed.*, 2022, **61**, e202204272.
21. P. A. DeSario, J. J. Pietron, D. E. DeVantier, T. H. Brintlinger, R. M. Stroud and D. R. Rolison, Plasmonic enhancement of visible-light water splitting with Au–TiO<sub>2</sub> composite aerogels, *Nanoscale*, 2013, **5**, 8079-8083.
22. T. Onishi, M. Teranishi, S. Naya, M. Fujishima and H. Tada, Electrocatalytic effect on the photon-to-current conversion efficiency of gold-nanoparticle-loaded titanium(IV) oxide plasmonic electrode for water oxidation, *J. Phys. Chem. C*, 2020, **124**, 6103-6109.
23. S.-F. Hung, F.-X. Xiao, Y.-Y. Hsu, N.-T. Suen, H.-B. Yang, H. M. Chen and B. Liu, Iridium oxide-assisted plasmon-induced hot carriers: Improvement on kinetics and thermodynamics of hot carriers, *Adv. Energy Mater.*, 2016, **6**, 1501339.

**Table S2.** EIS parameters for Au/TiO<sub>2</sub> plasmonic Electrodes <sup>a</sup>

|                               | $R_s / \Omega$  | CPE $\alpha$         | CPE $C_0$            | $R_{ct} / \Omega$ |
|-------------------------------|-----------------|----------------------|----------------------|-------------------|
| DP-Au/A-TiO <sub>2</sub> NPLA | $4.9 \times 10$ | $7.5 \times 10^{-1}$ | $8.1 \times 10^{-5}$ | $1.3 \times 10^3$ |
| DP-Au/R-TiO <sub>2</sub> NWA  | $4.4 \times 10$ | $8.5 \times 10^{-1}$ | $5.0 \times 10^{-6}$ | $9.0 \times 10^3$ |
| CR-Au/A-TiO <sub>2</sub> NPLA | $9.3 \times 10$ | $9.3 \times 10^{-1}$ | $4.5 \times 10^{-5}$ | $2.4 \times 10^5$ |

<sup>a</sup> Constant phase element (CPE) is expressed by the equation  $Z_{CPE} = 1/C_0(j\omega)^\alpha$ .

**Table S3.** Maximum enhancement factors ( $|E|^2/|E_0|^2$ ) calculated for HS-Au/A-TiO<sub>2</sub>, t-Oh-Au/A-TiO<sub>2</sub>, and t-Oh-Au/R-TiO<sub>2</sub> at the LSPR peak wavelengths by the 3D-FDTD method

| Model                      | $d / \text{nm}$ | $\lambda / \text{nm}$ | Monitor plane | Maximum $E/E_0$ | Maximum $ E ^2/ E_0 ^2$ |
|----------------------------|-----------------|-----------------------|---------------|-----------------|-------------------------|
| HS-Au/A-TiO <sub>2</sub>   | 7.9             | 702                   | xz            | 49.6            | $2.5 \times 10^3$       |
|                            |                 |                       | xy            | 59.9            | $3.6 \times 10^3$       |
| t-Oh-Au/A-TiO <sub>2</sub> | 7.6             | 617                   | xz            | 91.6            | $8.4 \times 10^3$       |
|                            |                 |                       | xy            | 192             | $3.7 \times 10^4$       |
|                            |                 | 637                   | xz            | 254             | $6.5 \times 10^4$       |
|                            |                 |                       | xy            | 292             | $8.5 \times 10^4$       |
|                            |                 | 650                   | xz            | 331             | $1.1 \times 10^5$       |
|                            |                 |                       | xy            | 333             | $1.1 \times 10^5$       |
|                            |                 | 670                   | xz            | 103             | $1.1 \times 10^4$       |
|                            |                 |                       | xy            | 336             | $1.1 \times 10^5$       |
| t-Oh-Au/R-TiO <sub>2</sub> | 6.2             | 672                   | xz            | 340             | $1.2 \times 10^5$       |
|                            |                 |                       | xy            | 340             | $1.2 \times 10^5$       |
|                            |                 | 706                   | xz            | 116             | $1.4 \times 10^4$       |
|                            |                 |                       | xy            | 383             | $1.5 \times 10^5$       |

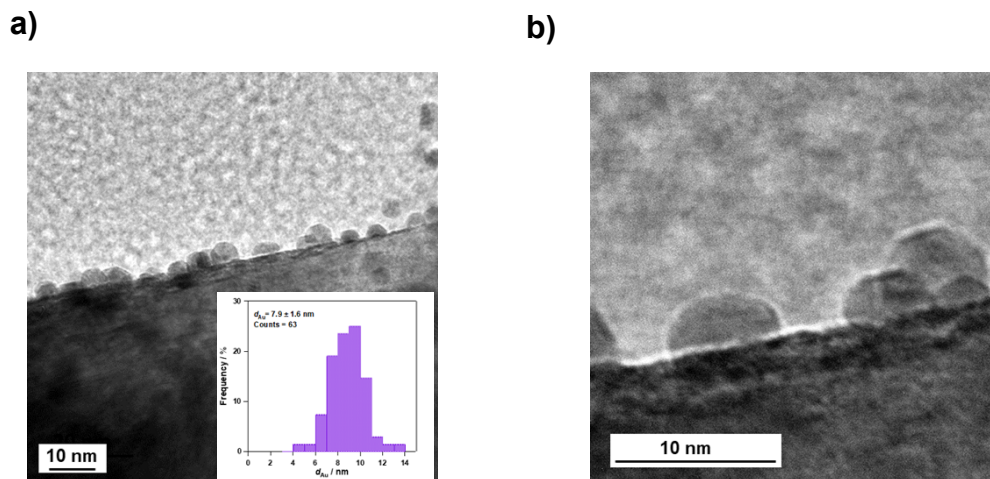

**Fig. S1.** (a) TEM image and Au particle size distribution (a) and HR-TEM image (b) of CR-Au/A-TiO<sub>2</sub> NPLA.

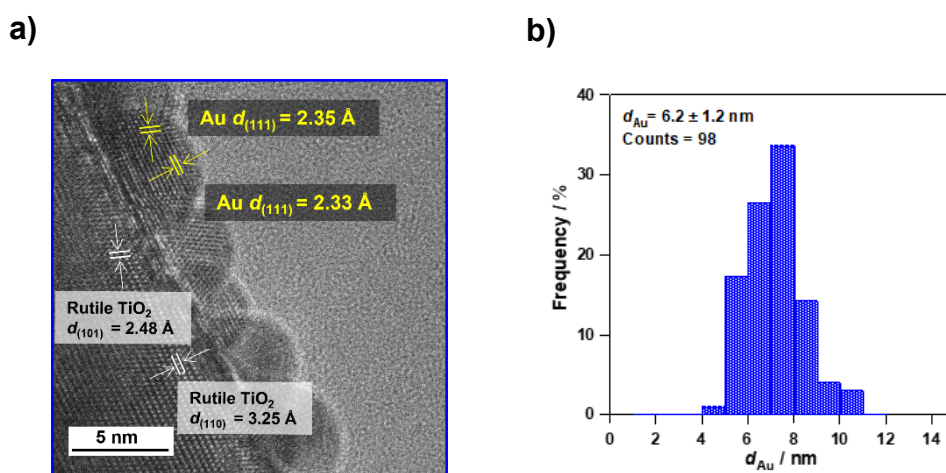

**Fig. S2.** HR-TEM image (a) and Au particle size distribution (b) of DP-Au/R-TiO<sub>2</sub> NWA.

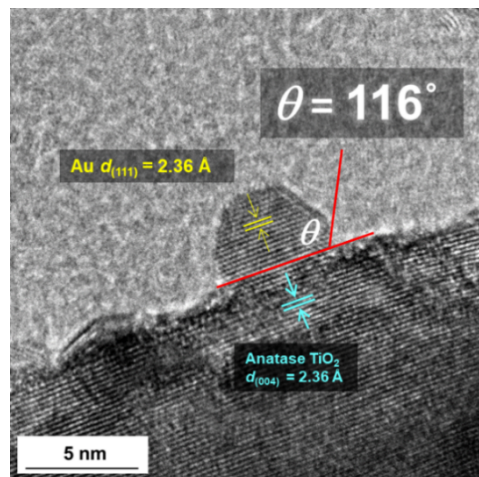

**Fig. S3.** Contact angle of Au NP on the A-TiO<sub>2</sub>(001) surface.

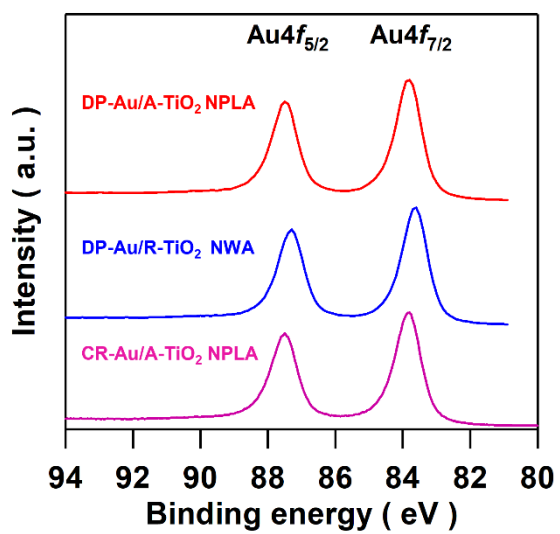

**Fig. S4.** Au4f XP spectra of DP-Au/A-TiO<sub>2</sub> NPLA, DP-Au/R-TiO<sub>2</sub> NWA, and CR-Au/A-TiO<sub>2</sub> NPLA.

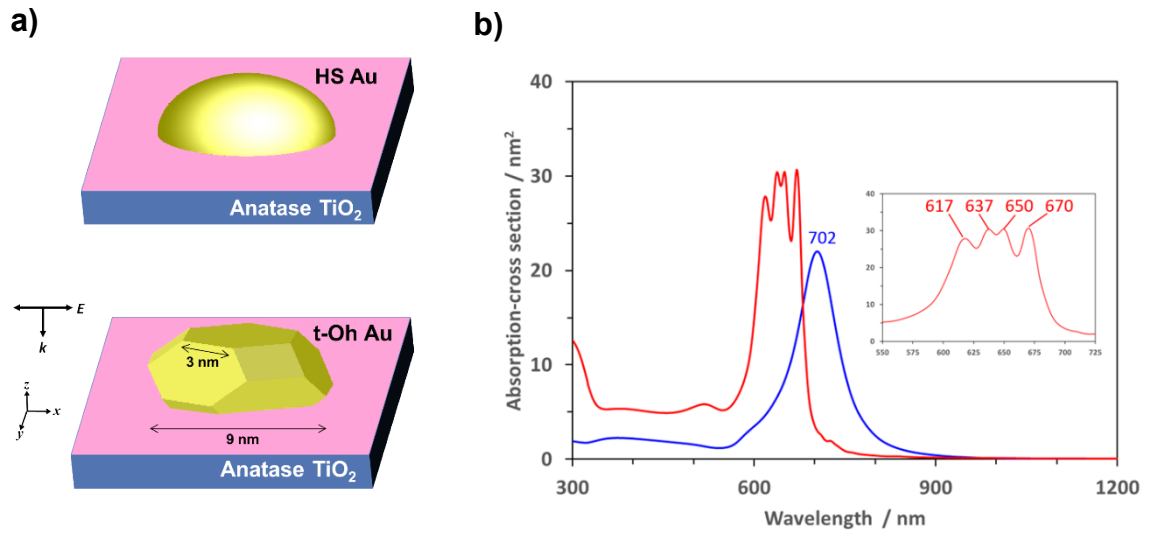

**Fig. S5.** (a) FDTD calculation models for CR-Au/A-TiO<sub>2</sub> (HS-Au/A-TiO<sub>2</sub>) and DP-Au/A-TiO<sub>2</sub> NPLA (t-Oh-Au/A-TiO<sub>2</sub>) (b) FDTD-simulated absorption spectra of the HS-Au/A-TiO<sub>2</sub> (blue) and t-Oh-Au/A-TiO<sub>2</sub> (red).

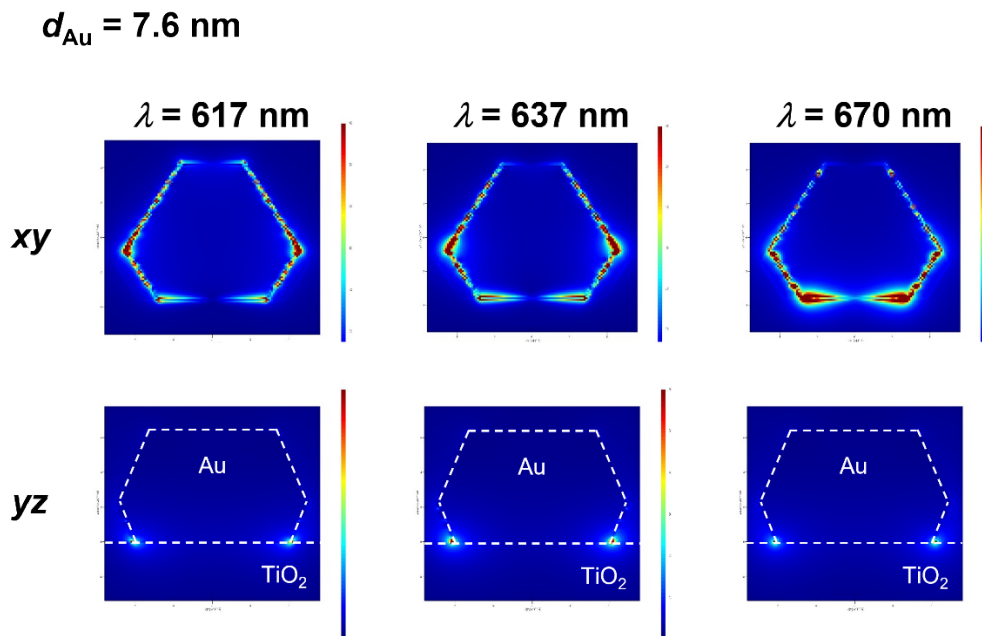

**Fig. S6.** Local electric field distribution for t-Oh-Au( $d_{Au} = 7.6$  nm)/A-TiO<sub>2</sub> calculated by the 3D-FDTD method.



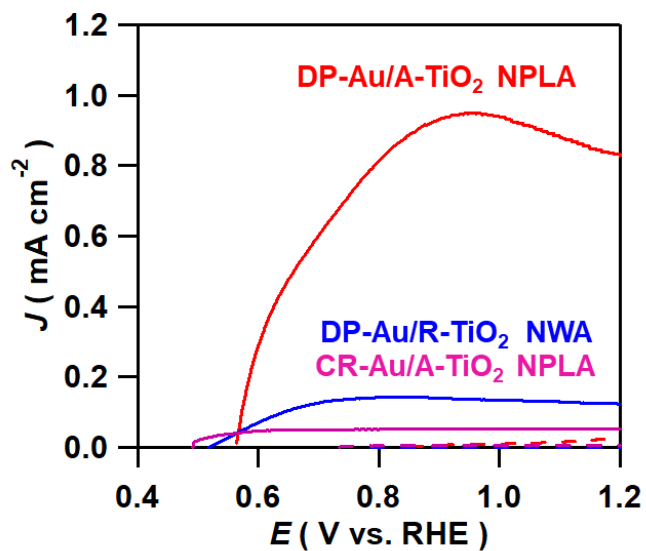

**Fig. S7.** Photocurrent ( $J$ )-potential ( $E$ ) curves of DP-Au/A-TiO<sub>2</sub> NPLA and DP-Au/R-TiO<sub>2</sub> NWA electrodes. The current density in each system was calculated using the specific surface area of the nanostructured TiO<sub>2</sub> determined by the BET method.

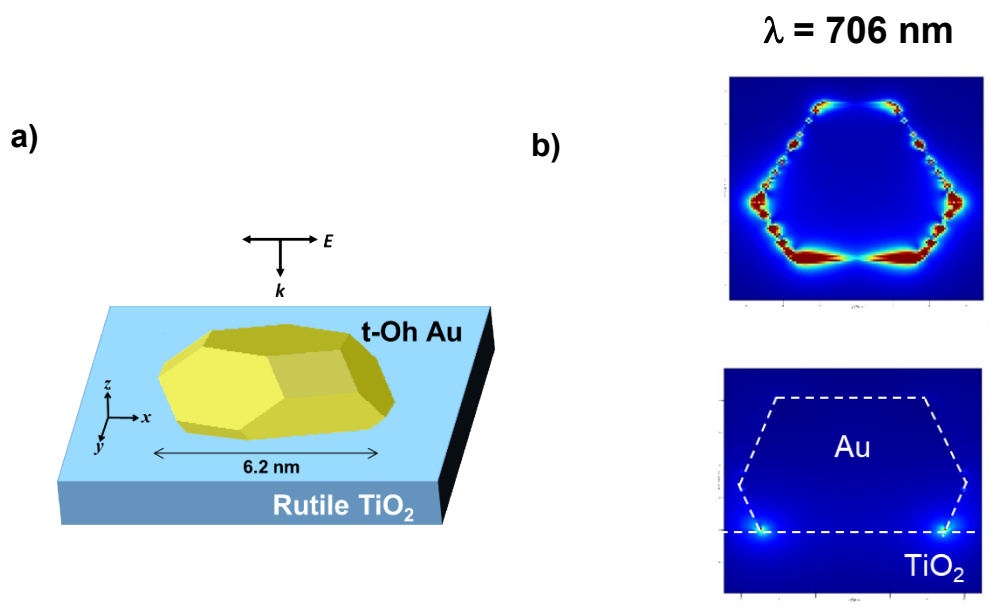

**Fig. S8.** Local electric fields for t-Oh-Au/R-TiO<sub>2</sub> (a) calculated by the 3D-FDTD method, and the local electric field distributions (b).
